# Supplementary material for: Hydrolysis of 1-(X-substituted-benzoyl)-4-aminopyridinium ions: effect of substituent X on reactivity and reaction mechanism
Source: Royal Society of Chemistry journal article supplement (doi:10.1039/c1ob06137b), 2011-01-01

## Electronic supplementary information

### Hydrolysis of 1-(X-substituted-benzoyl)-4-aminopyridinium ions: Effect of substituent X on reactivity and reaction mechanism

Ik-Hwan Um,<sup>\*</sup> Eun-Hee Kim, and Ji-Sun Kang

Department of Chemistry and Nano Science, Ewha Womans University, Seoul 120-750,  
Korea.

e-mail: ihum@ewha.ac.kr Tel: 82-2-3277-2349. Fax: 822-3277-2844.

#### Table of contents

**Tables S1-S9** Kinetic data for the hydrolysis of 1-(X-substituted-benzoyl)-4-aminopyridinium ions **2a-i** in 80 mol % H<sub>2</sub>O/20 mol % DMSO at 25.0 ± 0.1 °C -----2 – 4

**Figs. S1-S8** Plots of  $k_{\text{obsd}}$  vs. [4-aminopyridine] for the hydrolysis of 1-(X-substituted-benzoyl)-4-aminopyridinium ions **2a-i** in 80 mol % H<sub>2</sub>O/20 mol % DMSO at 25.0 ± 0.1 °C --  
-----5 – 8

**Figs. S9-S17** <sup>1</sup>H NMR spectra for 2,4-dinitrophenyl X-substituted benzoates **1a-i** -----9 – 13

**Table S1** Kinetic data for the hydrolysis of 1-(4-dimethylaminobenzoyl)-4-aminopyridinium ion **2a** in 80 mol % H<sub>2</sub>O/20 mol % DMSO at 25.0 ± 0.1 °C

| [4-aminopyridine] / mM | 10 <sup>4</sup> k <sub>obsd</sub> / s <sup>-1</sup> |
|------------------------|-----------------------------------------------------|
| 24.2                   | 3.21                                                |
| 43.4                   | 4.38                                                |
| 58.9                   | 5.12                                                |
| 71.7                   | 5.73                                                |
| 82.4                   | 6.34                                                |
| 103                    | 7.33                                                |

$$k_{\text{cat}} = 0.00518 \pm 0.0001 \text{ M}^{-1} \text{ s}^{-1}$$

$$k_{\text{o}} = 0.000204 \pm 0.000008 \text{ s}^{-1}$$

$$R^2 = 0.9990$$

**Table S2** Kinetic data for the hydrolysis of 1-(4-methoxybenzoyl)-4-aminopyridinium ion **2b** in 80 mol % H<sub>2</sub>O/20 mol % DMSO at 25.0 ± 0.1 °C

| [4-aminopyridine] / mM | 10 <sup>3</sup> k <sub>obsd</sub> / s <sup>-1</sup> |
|------------------------|-----------------------------------------------------|
| 9.81                   | 5.23                                                |
| 18.7                   | 6.22                                                |
| 26.9                   | 7.20                                                |
| 34.3                   | 8.03                                                |
| 41.2                   | 8.87                                                |

$$k_{\text{cat}} = 0.116 \pm 0.001 \text{ M}^{-1} \text{ s}^{-1}$$

$$k_{\text{o}} = 0.000408 \pm 0.000020 \text{ s}^{-1}$$

$$R^2 = 0.9999$$

**Table S3** Kinetic data for the hydrolysis of 1-(4-methylbenzoyl)-4-aminopyridinium ion **2c** in 80 mol % H<sub>2</sub>O/20 mol % DMSO at 25.0 ± 0.1 °C

| [4-aminopyridine] / mM | 10 <sup>3</sup> k <sub>obsd</sub> / s <sup>-1</sup> |
|------------------------|-----------------------------------------------------|
| 9.81                   | 11.5                                                |
| 18.7                   | 13.9                                                |
| 26.9                   | 16.3                                                |
| 34.3                   | 18.3                                                |
| 41.2                   | 20.0                                                |

$$k_{\text{cat}} = 0.273 \pm 0.004 \text{ M}^{-1} \text{ s}^{-1}$$

$$k_{\text{o}} = 0.00884 \pm 0.00010 \text{ s}^{-1}$$

$$R^2 = 0.9996$$

**Table S4** Kinetic data for the hydrolysis of 1-(3-methylbenzoyl)-4-aminopyridinium ion **2d** in 80 mol % H<sub>2</sub>O/20 mol % DMSO at 25.0 ± 0.1 °C

| [4-aminopyridine] / mM | 10 <sup>3</sup> <i>k</i> <sub>obsd</sub> / s <sup>-1</sup> |
|------------------------|------------------------------------------------------------|
| 9.81                   | 17.8                                                       |
| 18.7                   | 22.0                                                       |
| 26.9                   | 25.9                                                       |
| 34.3                   | 29.1                                                       |
| 41.2                   | 32.3                                                       |

$$k_{\text{cat}} = 0.461 \pm 0.005 \text{ M}^{-1}\text{s}^{-1}$$

$$k_0 = 0.0134 \pm 0.0001 \text{ s}^{-1}$$

$$R^2 = 0.9998$$

**Table S5** Kinetic data for the hydrolysis of 1-benzoyl-4-aminopyridinium ion **2e** in 80 mol % H<sub>2</sub>O/20 mol % DMSO at 25.0 ± 0.1 °C

| [4-aminopyridine] / mM | 10 <sup>3</sup> <i>k</i> <sub>obsd</sub> / s <sup>-1</sup> |
|------------------------|------------------------------------------------------------|
| 4.08                   | 19.8                                                       |
| 8.00                   | 22.1                                                       |
| 15.4                   | 26.1                                                       |
| 22.3                   | 30.5                                                       |
| 28.7                   | 33.8                                                       |
| 34.7                   | 37.7                                                       |

$$k_{\text{cat}} = 0.581 \pm 0.008 \text{ M}^{-1}\text{s}^{-1}$$

$$k_0 = 0.0174 \pm 0.0002 \text{ s}^{-1}$$

$$R^2 = 0.9996$$

**Table S6** Kinetic data for the hydrolysis of 1-(4-chlorobenzoyl)-4-aminopyridinium ion **2f** in 80 mol % H<sub>2</sub>O/20 mol % DMSO at 25.0 ± 0.1 °C

| [4-aminopyridine] / mM | 10 <sup>3</sup> <i>k</i> <sub>obsd</sub> / s <sup>-1</sup> |
|------------------------|------------------------------------------------------------|
| 4.04                   | 42.1                                                       |
| 7.92                   | 46.4                                                       |
| 11.7                   | 50.4                                                       |
| 15.3                   | 54.0                                                       |
| 18.7                   | 58.0                                                       |

$$k_{\text{cat}} = 1.07 \pm 0.01 \text{ M}^{-1}\text{s}^{-1}$$

$$k_0 = 0.0378 \pm 0.0002 \text{ s}^{-1}$$

$$R^2 = 0.9997$$

**Table S7** Kinetic data for the hydrolysis of 1-(3-chlorobenzoyl)-4-aminopyridinium ion **2g** in 80 mol % H<sub>2</sub>O/20 mol % DMSO at 25.0 ± 0.1 °C

| [4-aminopyridine] / mM | 10 <sup>3</sup> <i>k</i> <sub>obsd</sub> / s <sup>-1</sup> |
|------------------------|------------------------------------------------------------|
| 2.29                   | 69.3                                                       |
| 4.06                   | 72.6                                                       |
| 7.96                   | 82.3                                                       |
| 11.7                   | 91.3                                                       |
| 15.3                   | 98.9                                                       |
| 18.8                   | 106                                                        |

$$k_{\text{cat}} = 2.26 \pm 0.04 \text{ M}^{-1} \text{ s}^{-1}$$

$$k_0 = 0.0640 \pm 0.0008 \text{ s}^{-1}$$

$$R^2 = 0.9993$$

**Table S8** Kinetic data for the hydrolysis of 1-(4-cyanobenzoyl)-4-aminopyridinium ion **2h** in 80 mol % H<sub>2</sub>O/20 mol % DMSO at 25.0 ± 0.1 °C

| [4-aminopyridine] / mM | <i>k</i> <sub>obsd</sub> / s <sup>-1</sup> |
|------------------------|--------------------------------------------|
| 1.03                   | 0.143                                      |
| 1.63                   | 0.148                                      |
| 2.44                   | 0.154                                      |
| 2.84                   | 0.157                                      |
| 3.24                   | 0.160                                      |
| 4.04                   | 0.166                                      |

$$k_{\text{cat}} = 7.60 \pm 0.07 \text{ M}^{-1} \text{ s}^{-1}$$

$$k_0 = 0.135 \pm 0.0002 \text{ s}^{-1}$$

$$R^2 = 0.9998$$

**Table S9** Kinetic data for the hydrolysis of 1-(4-chloro-3-nitrobenzoyl)-4-aminopyridinium ion **2i** in 80 mol % H<sub>2</sub>O/20 mol % DMSO at 25.0 ± 0.1 °C

| [4-aminopyridine] / mM | <i>k</i> <sub>obsd</sub> / s <sup>-1</sup> |
|------------------------|--------------------------------------------|
| 10.2                   | 0.406                                      |
| 20.4                   | 0.505                                      |
| 30.6                   | 0.614                                      |
| 40.8                   | 0.705                                      |
| 51.0                   | 0.798                                      |

$$k_{\text{cat}} = 9.65 \pm 0.18 \text{ M}^{-1} \text{ s}^{-1}$$

$$k_0 = 0.310 \pm 0.006 \text{ s}^{-1}$$

$$R^2 = 0.9994$$



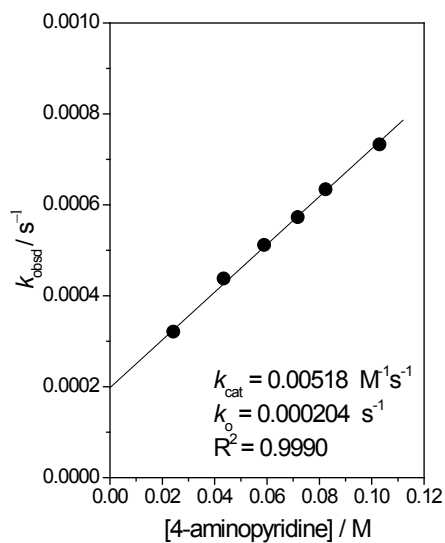

**Fig. S1** Plot of  $k_{\text{obsd}}$  vs. [4-aminopyridine] for the hydrolysis of 1-(4-dimethylaminobenzoyl)-4-aminopyridinium ion **2a** in 80 mol % H<sub>2</sub>O/20 mol % DMSO at 25.0 ± 0.1 °C.

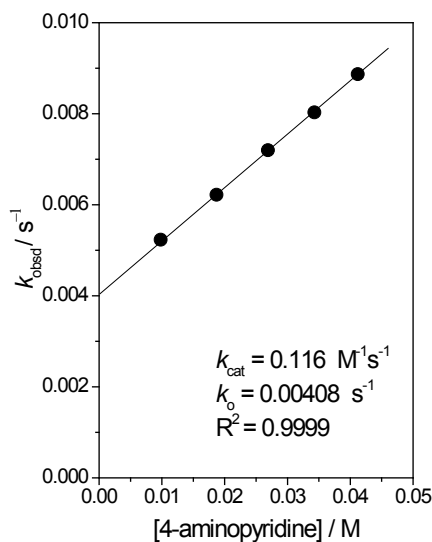

**Fig. S2** Plot of  $k_{\text{obsd}}$  vs. [4-aminopyridine] for the hydrolysis of 1-(4-methoxybenzoyl)-4-aminopyridinium ion **2b** in 80 mol % H<sub>2</sub>O/20 mol % DMSO at 25.0 ± 0.1 °C.

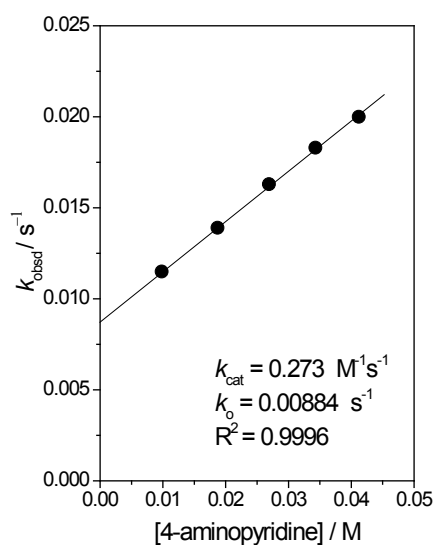

**Fig. S3** Plot of  $k_{\text{obsd}}$  vs. [4-aminopyridine] for the hydrolysis of 1-(4-methylbenzoyl)-4-aminopyridinium ion **2c** in 80 mol %  $\text{H}_2\text{O}$ /20 mol % DMSO at  $25.0 \pm 0.1 \text{ }^\circ\text{C}$ .

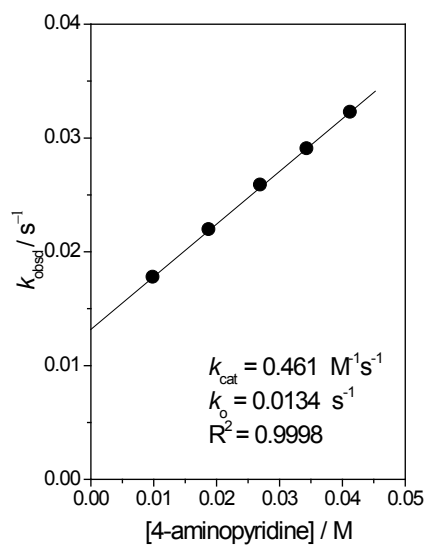

**Fig. S4** Plot of  $k_{\text{obsd}}$  vs. [4-aminopyridine] for the hydrolysis of 1-(3-methylbenzoyl)-4-aminopyridinium ion **2d** in 80 mol %  $\text{H}_2\text{O}$ /20 mol % DMSO at  $25.0 \pm 0.1 \text{ }^\circ\text{C}$ .

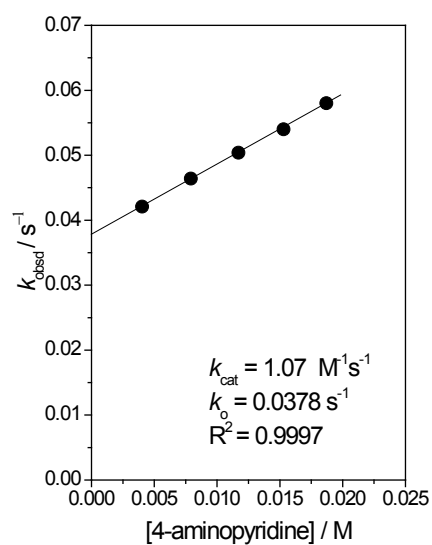

**Fig. S5** Plot of  $k_{\text{obsd}}$  vs. [4-aminopyridine] for the hydrolysis of 1-(4-chlorobenzoyl)-4-aminopyridinium ion **2f** in 80 mol % H<sub>2</sub>O/20 mol % DMSO at 25.0 ± 0.1 °C.

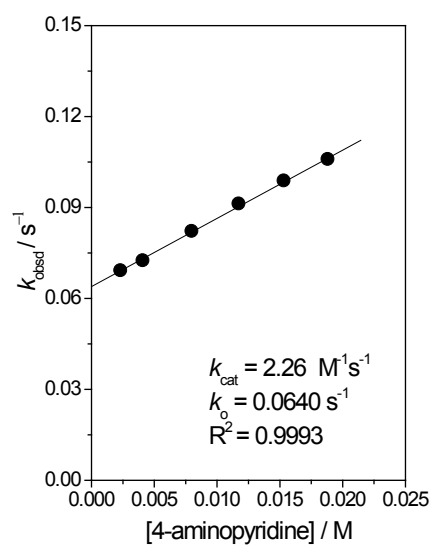

**Fig. S6** Plot of  $k_{\text{obsd}}$  vs. [4-aminopyridine] for the hydrolysis of 1-(3-chlorobenzoyl)-4-aminopyridinium ion **2g** in 80 mol % H<sub>2</sub>O/20 mol % DMSO at 25.0 ± 0.1 °C.

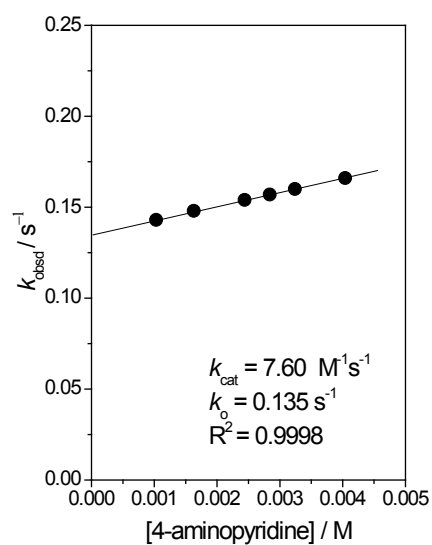

**Fig. S7** Plot of  $k_{\text{obsd}}$  vs. [4-aminopyridine] for the hydrolysis of 1-(4-cyanobenzoyl)-4-aminopyridinium ion **2h** in 80 mol % H<sub>2</sub>O/20 mol % DMSO at 25.0 ± 0.1 °C.

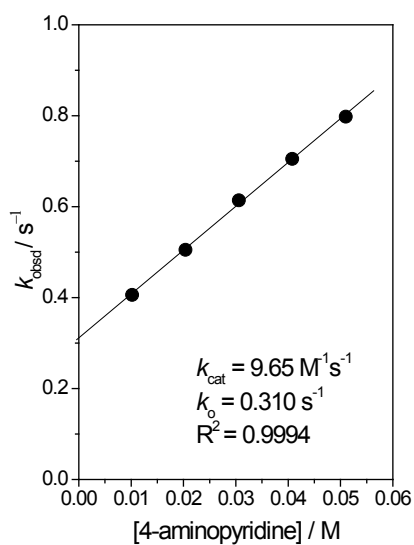

**Fig. S8** Plot of  $k_{\text{obsd}}$  vs. [4-aminopyridine] for the hydrolysis of 1-(4-chloro-3-nitrobenzoyl)-4-aminopyridinium ion **2i** in 80 mol % H<sub>2</sub>O/20 mol % DMSO at 25.0 ± 0.1.

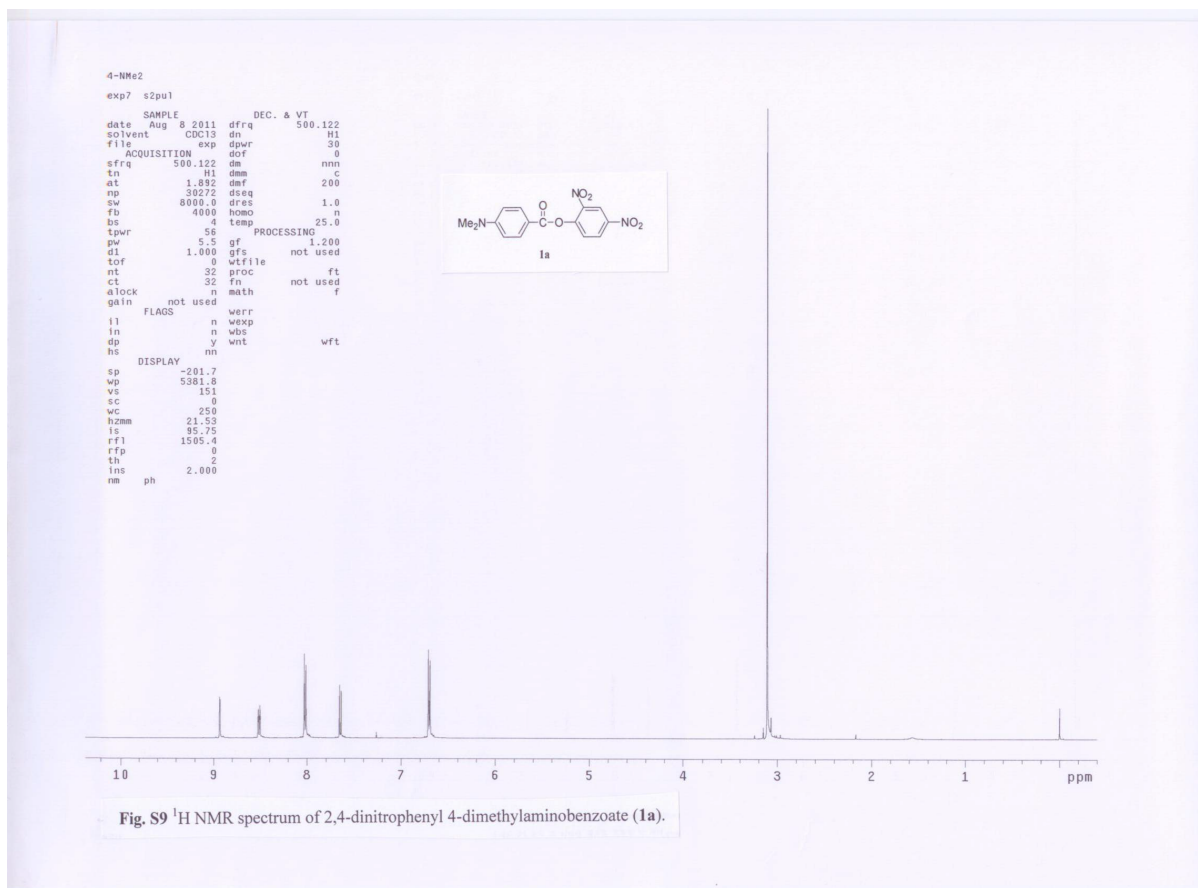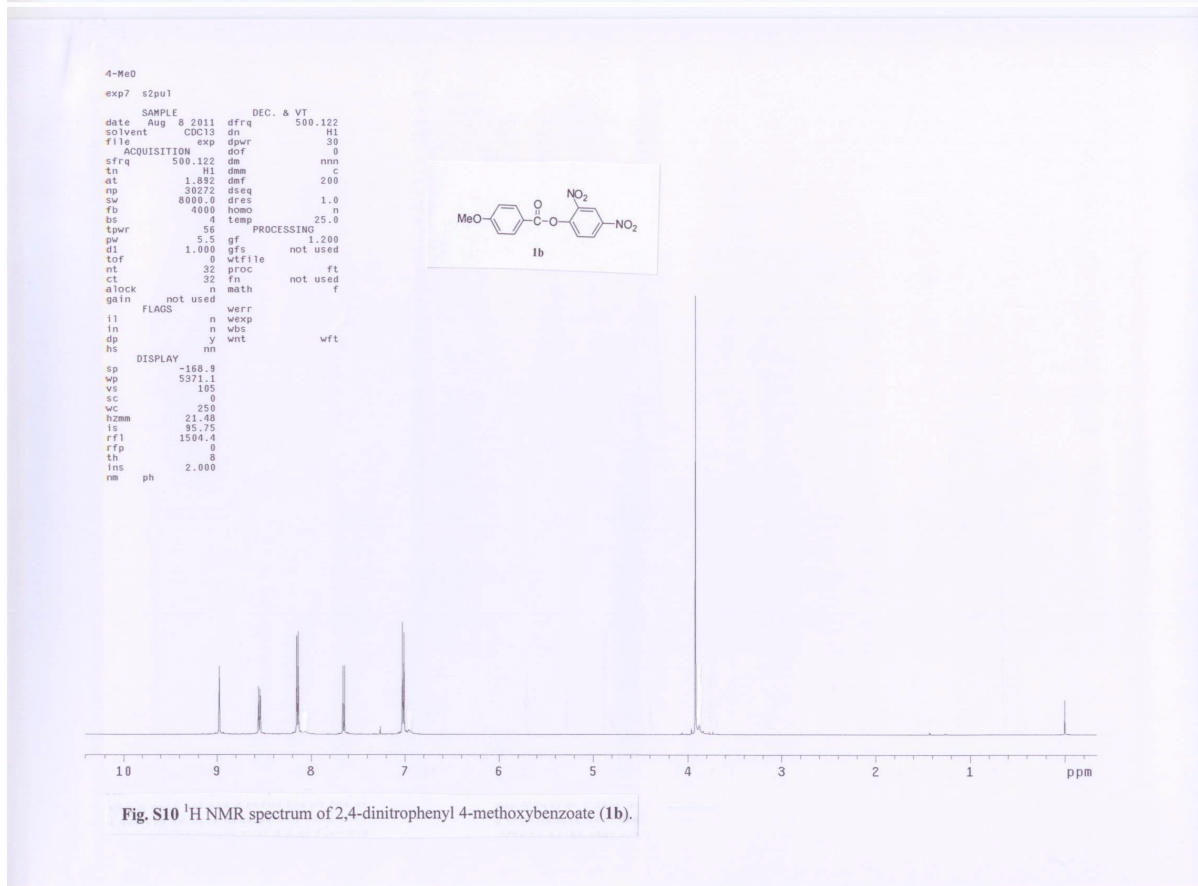

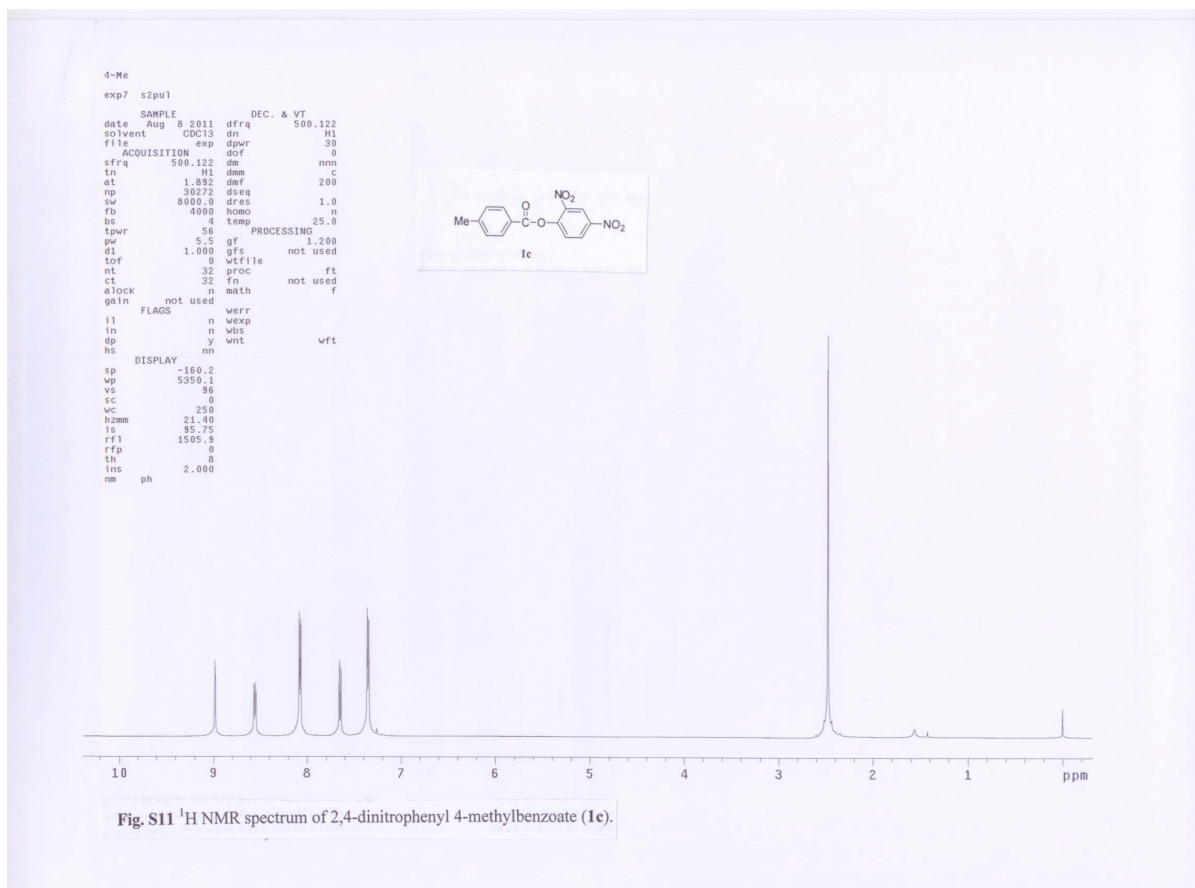

Fig. S11 <sup>1</sup>H NMR spectrum of 2,4-dinitrophenyl 4-methylbenzoate (1c).

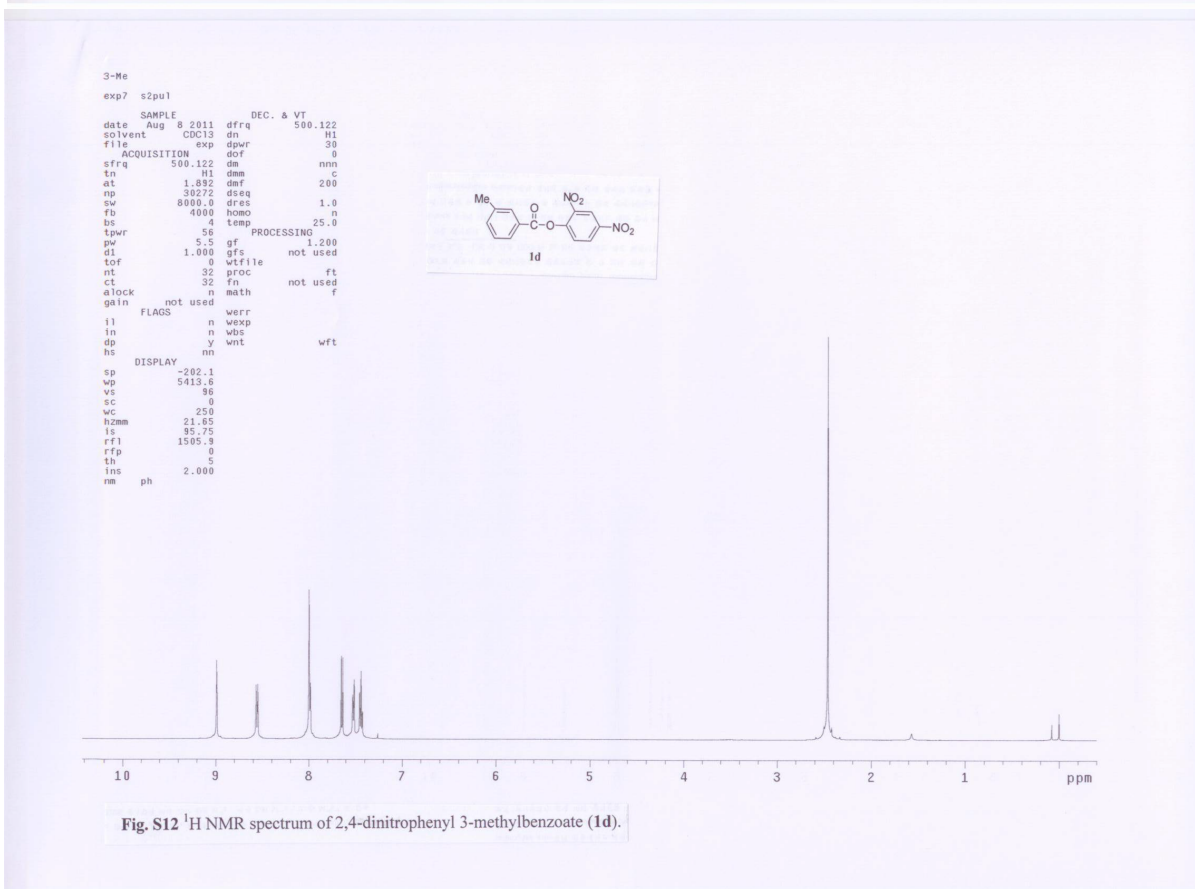

Fig. S12 <sup>1</sup>H NMR spectrum of 2,4-dinitrophenyl 3-methylbenzoate (1d).

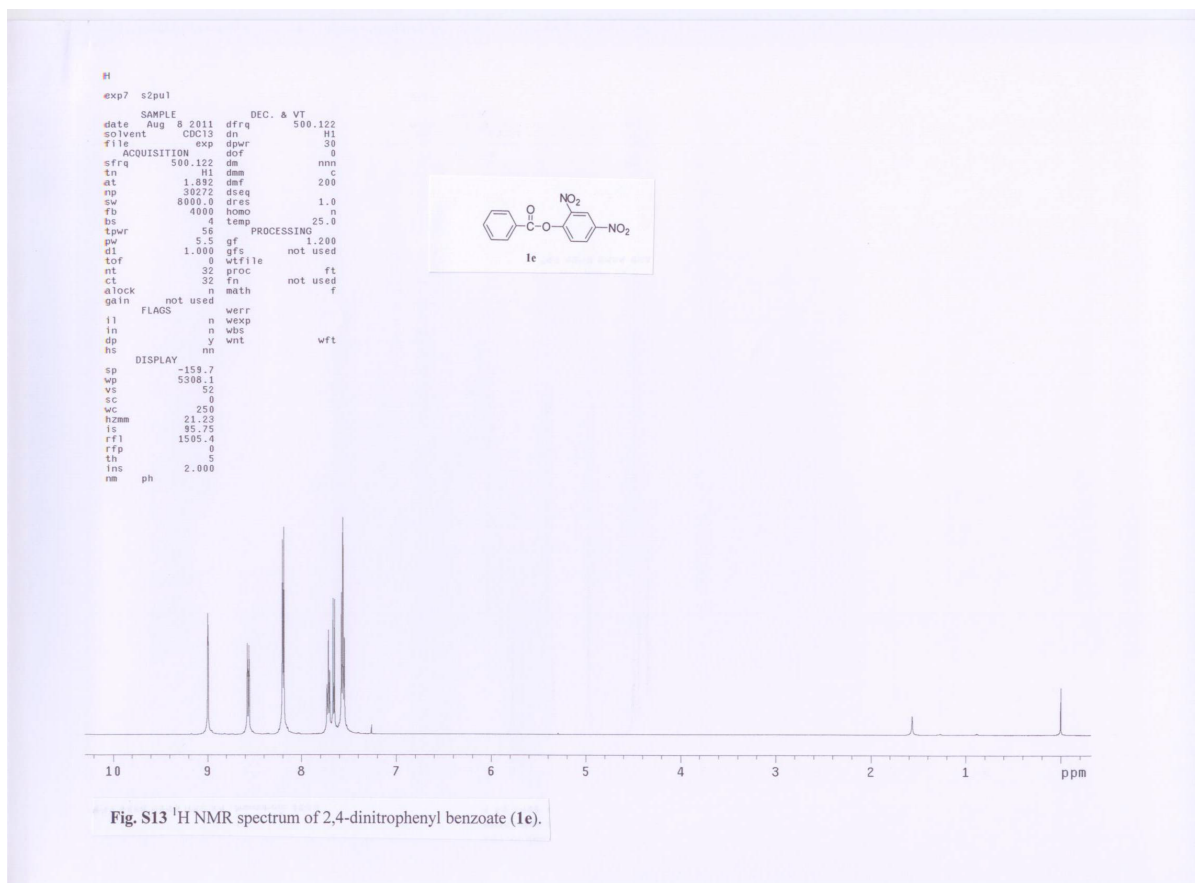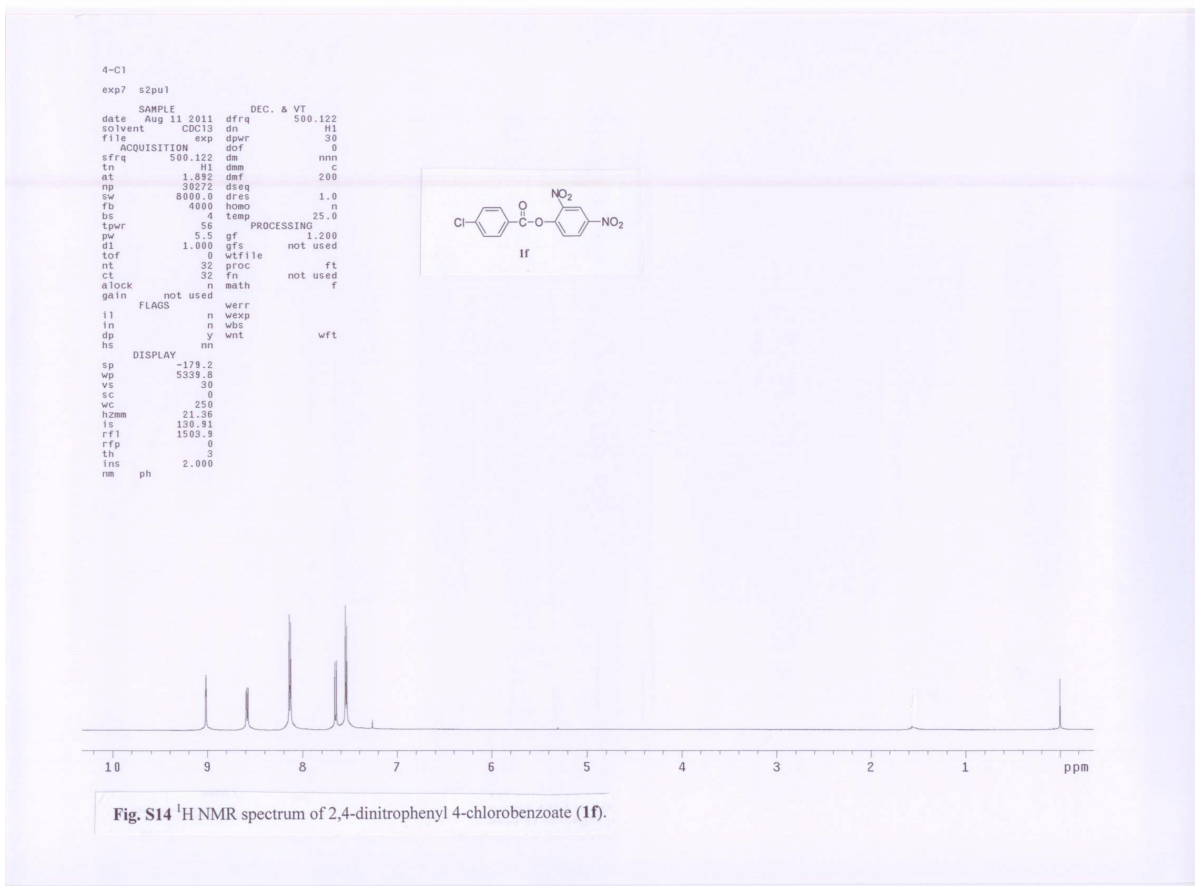



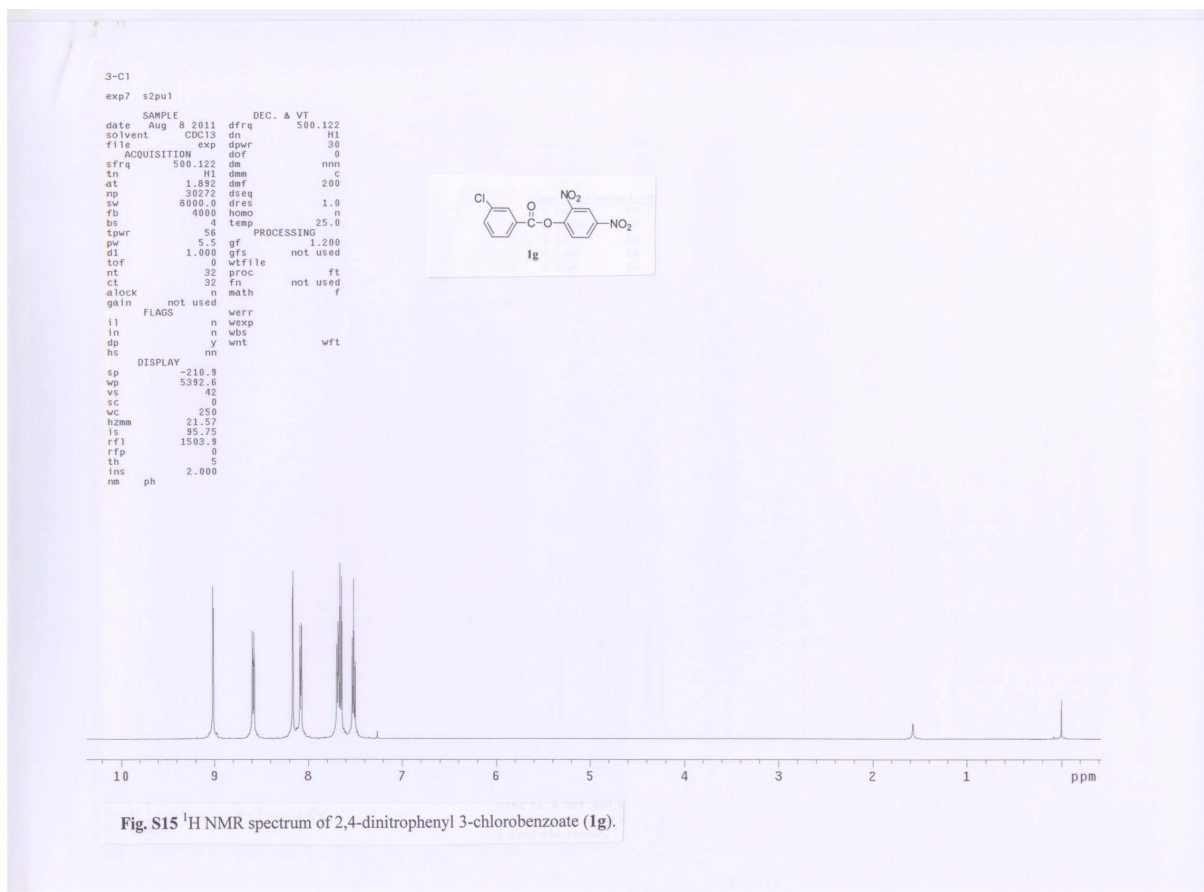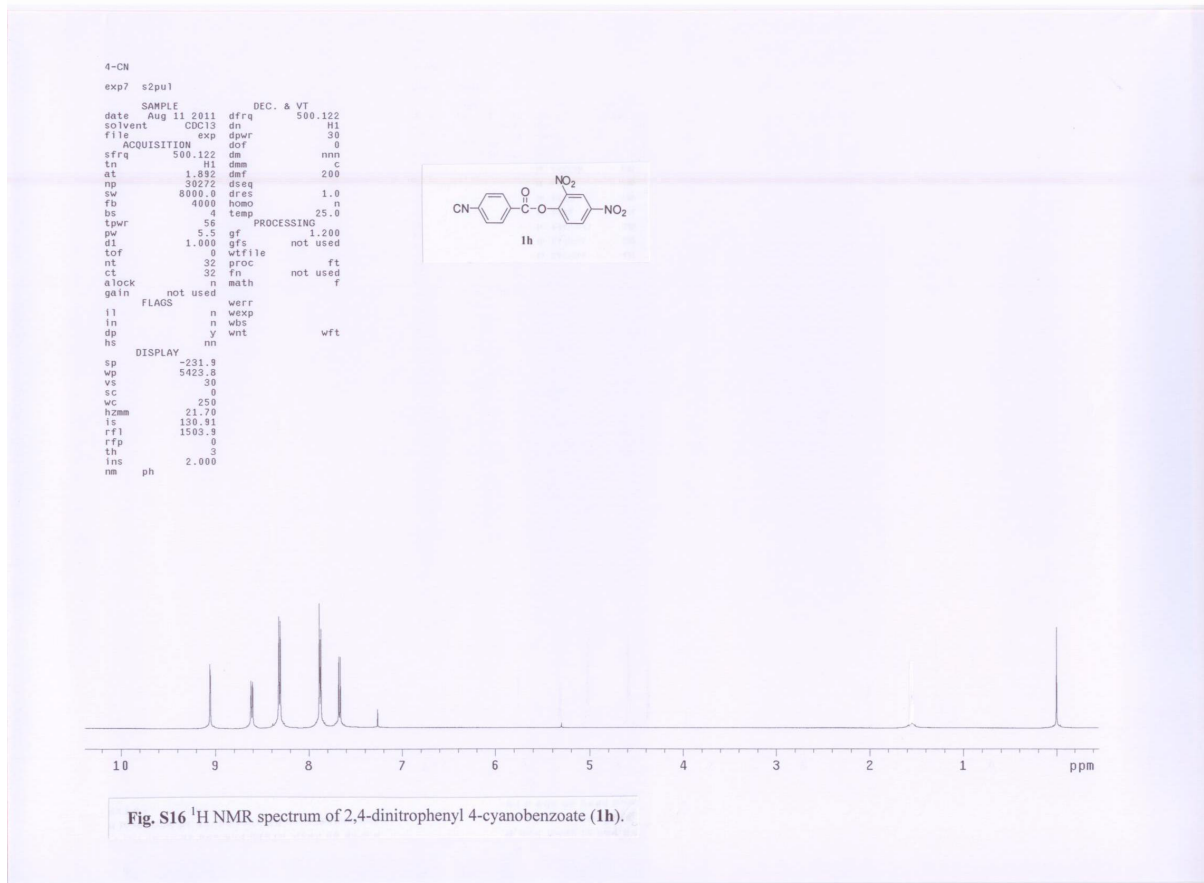



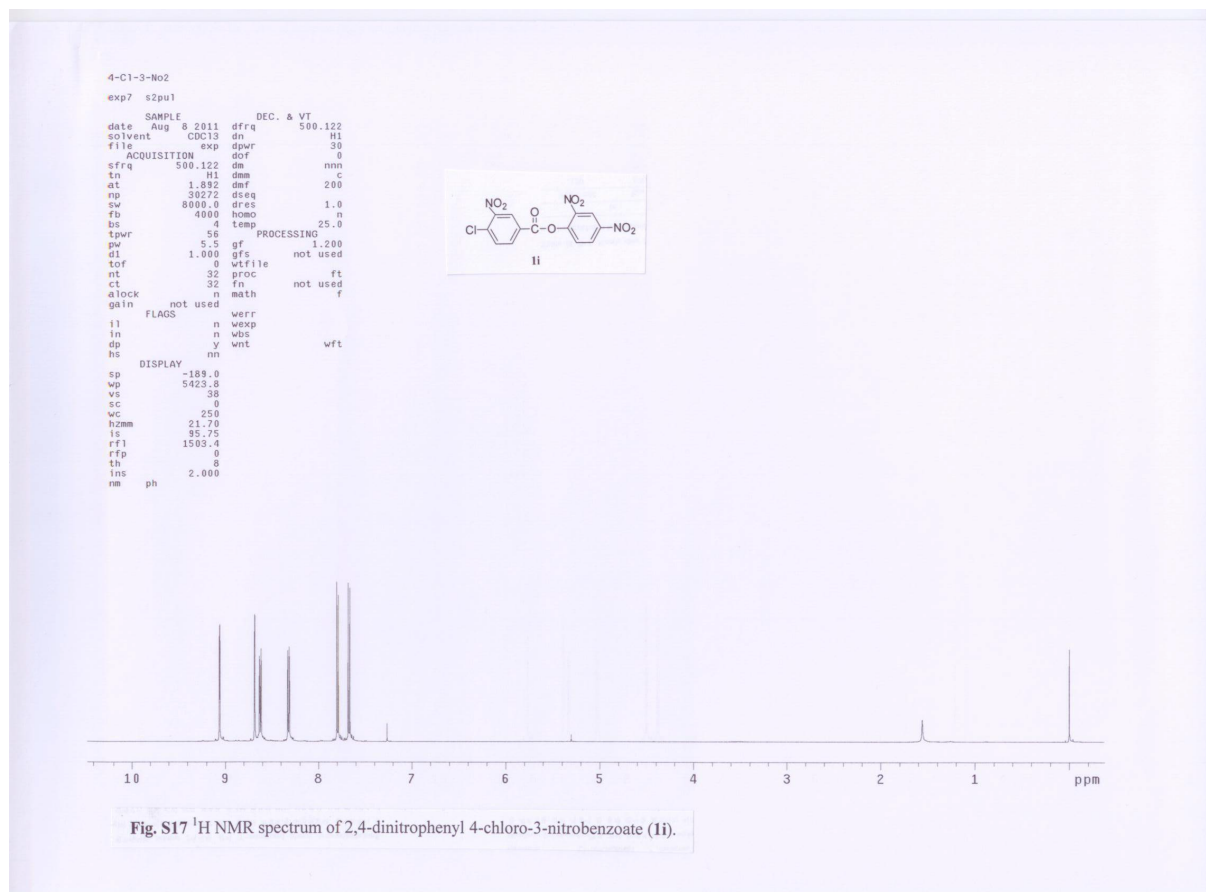

Supplement: c1ob06137b.pdf [file c1ob06137b.pdf]
